# Supplementary material for: Insight into the hetero-interactions of 4-nonylphenol with dissolved organic matter: multiple spectroscopic methods, 1H NMR study and principal component analysis
Source: Royal Society of Chemistry journal article supplement (doi:10.1039/d2ra03739d), 2022-01-01
Supplement: d2ra03739d1.pdf [file d2ra03739d1.pdf]

**Insight into the hetero-interactions of 4-nonylphenol with dissolved organic matter: Multi-spectroscopic methods,  $^1\text{H}$  NMR study and principal component analysis**

Rui Gao<sup>a</sup>, Hao Wang<sup>a</sup>, Abliz Abdurahman<sup>a</sup>, Weiqian Liang<sup>a</sup>, Xiaotian Lu<sup>a</sup>, Shuyin Wei<sup>a</sup>, Feng Zeng<sup>a,\*</sup>

**Supplementary Information**

**S1. Experimental**

**S2. Supplementary Tables**

**S3. Supplementary Figures**

## **S1. Experimental**

### **1. 1 Analysis of the pristine and MW-fractionated HAs**

The contents of C, H and N in HAs were determined using an elemental analyzer (Elementar Analysensysteme GmbH, Germany). The average molecular weights of the pristine- and MW-fractionated HAs were measured using a high-performance size-exclusion chromatography (HPSEC) unit with a UV detector (Shimadzu, Japan) and a Superdex 75 10/300 GL SEC column (GE, NJ). UV-visible absorption spectra were obtained using a spectrophotometer (Shimadzu, Japan). Specific UV absorbance at 254 nm ( $SUVA_{254}$ ), which represented the aromaticity, was obtained via the division of the absorbance at 254 nm ( $m^{-1}$ ) with TOC concentration. Fluorescence excitation (Ex)-emission (Em) matrix (EEM) spectra of the pristine- and MW-fractionated HAs were measured using a fluorescence spectrometer (Edinburgh, UK). The humification index (HIX), was determined as the relative ratio of fluorescence intensity areas of two different wavelength ranges (Em: 300-345 nm, 435-480 nm) at the Ex wavelength of 254 nm.

**Table S1** Selective physiochemical parameters of 4-NP and used this study.

| CAS      | Formula                           | Molar mass<br>(g/mol) | Log K <sub>ow</sub> | Solubility<br>(mg/L) | pKa  | Molecular structure                                                                |
|----------|-----------------------------------|-----------------------|---------------------|----------------------|------|------------------------------------------------------------------------------------|
| 104-40-5 | C <sub>15</sub> H <sub>24</sub> O | 220.35                | 5.76                | 5.4                  | 10.7 | 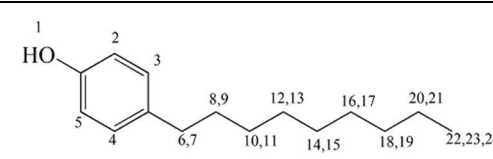 |

**Table S2** Elemental compositions, atomic ratios, and spectroscopic parameters of the pristine- and MW-fractionated HAs.

| HAs           | Elemental Compositions (%) |      |      |      | Ash content (%) | atomic ratio |      |                        | Mn (kDa) | Mw (kDa) | $\rho$ | Carboxyl group (mmol/g) | Phenolic group (mmol/g) | Total acidity (mmol/g) | SUVA <sub>254</sub> | HIX  |
|---------------|----------------------------|------|------|------|-----------------|--------------|------|------------------------|----------|----------|--------|-------------------------|-------------------------|------------------------|---------------------|------|
|               | C                          | H    | N    | O    |                 | H/C          | O/C  | Polarity index (O+N)/C |          |          |        |                         |                         |                        |                     |      |
| pristine HA   | 53.8                       | 6.61 | 3.99 | 34.5 | 1.11            | 1.47         | 0.48 | 0.55                   | 5.05     | 15.7     | 3.10   | 4.08                    | 2.04                    | 6.12                   | 9.19                | 16.8 |
| > 100kDa HA   | 54.2                       | 6.69 | 4.05 | 32.5 | 2.65            | 1.48         | 0.45 | 0.51                   | 7.84     | 20.9     | 2.66   | 2.45                    | 1.63                    | 4.08                   | 9.24                | 13.3 |
| 30-100 kDa HA | 52.8                       | 6.42 | 3.77 | 35.9 | 1.09            | 1.46         | 0.51 | 0.57                   | 4.83     | 7.60     | 1.57   | 2.72                    | 1.55                    | 4.27                   | 9.30                | 27.1 |
| 10-30 kDa HA  | 51.7                       | 6.03 | 3.53 | 37.8 | 0.98            | 1.40         | 0.55 | 0.61                   | 3.56     | 4.19     | 1.17   | 4.40                    | 3.17                    | 7.57                   | 8.98                | 13.9 |
| 3-10 kDa HA   | 51.1                       | 5.73 | 3.35 | 38.7 | 1.06            | 1.34         | 0.57 | 0.62                   | 2.73     | 3.14     | 1.15   | 6.12                    | 3.72                    | 9.84                   | 8.00                | 11.1 |
| <3kDa HA      | 50.4                       | 5.31 | 3.09 | 40.5 | 0.70            | 1.26         | 0.60 | 0.65                   | 2.08     | 2.30     | 1.10   | 7.38                    | 3.83                    | 11.2                   | 6.99                | 7.85 |

H/C: atomic ratio of hydrogen to carbon. O/C: atomic ratio of oxygen to carbon. (N+O)/C: atomic ratio of sum of oxygen and nitrogen to carbon. Weight-average molecular weight (Mw) and number-average molecular weight (Mn) measured using HPSEC. Polydispersity ( $\rho$ ) calculated as Mw/Mn. Carboxyl and phenolic group contents and total acidity were measured using the method of potentiometric titration. SUVA<sub>254</sub> was calculated by dividing the absorption coefficient at 254 nm ( $a_{254}$ ) with DOC concentration ( $L \cdot (mg\ C \cdot m)^{-1}$ ). Humification index (HIX) was calculated as the ratio of the peak area under Em spectra 435-480 nm relative to that 300-345 nm at the Ex wavelength of 254 nm.

**Table S3.** Binding parameters of 4-NP-HAs induced by different pH values and ionic strengths based on the fluorescence titration experiments; T=298K.

| pH | IS<br>(mmol·L <sup>-1</sup> ) | HAs           | Stern-Volmer equation                        |                | Site-binding equation          |       |                |
|----|-------------------------------|---------------|----------------------------------------------|----------------|--------------------------------|-------|----------------|
|    |                               |               | K <sub>HA</sub><br>(L·(mg·C) <sup>-1</sup> ) | R <sup>2</sup> | K<br>(L·(mg·C) <sup>-1</sup> ) | n     | R <sup>2</sup> |
|    |                               |               |                                              |                |                                |       |                |
| 3  |                               | pristine HA   | 0.145                                        | 0.999          | 0.133                          | 1.05  | 0.999          |
|    |                               | > 100 kDa HA  | 0.151                                        | 0.999          | 0.144                          | 1.03  | 0.998          |
|    |                               | 30-100 kDa HA | 0.142                                        | 0.999          | 0.132                          | 1.03  | 0.999          |
|    |                               | 10-30 kDa HA  | 0.131                                        | 0.999          | 0.121                          | 1.05  | 0.998          |
|    |                               | 3-10 kDa HA   | 0.097                                        | 0.999          | 0.100                          | 0.985 | 0.999          |
|    |                               | < 3k Da HA    | 0.077                                        | 0.999          | 0.079                          | 0.985 | 0.999          |
| 6  | 1                             | pristine HA   | 0.139                                        | 0.999          | 0.132                          | 1.02  | 0.995          |
|    |                               | > 100 kDa HA  | 0.145                                        | 0.999          | 0.142                          | 1.00  | 0.993          |
|    |                               | 30-100 kDa HA | 0.134                                        | 0.999          | 0.128                          | 1.01  | 0.994          |
|    |                               | 10-30 kDa HA  | 0.124                                        | 0.998          | 0.119                          | 1.01  | 0.983          |
|    |                               | 3-10 kDa HA   | 0.091                                        | 0.999          | 0.097                          | 0.955 | 0.994          |
|    |                               | < 3k Da HA    | 0.065                                        | 0.999          | 0.072                          | 0.957 | 0.999          |
| 11 |                               | pristine HA   | 0.083                                        | 0.999          | 0.088                          | 0.960 | 0.985          |
|    |                               | > 100 kDa HA  | 0.088                                        | 0.999          | 0.090                          | 0.984 | 0.996          |
|    |                               | 30-100 kDa HA | 0.081                                        | 0.999          | 0.083                          | 0.985 | 0.992          |
|    |                               | 10-30 kDa HA  | 0.076                                        | 0.999          | 0.073                          | 1.02  | 0.990          |
|    |                               | 3-10 kDa HA   | 0.049                                        | 0.999          | 0.061                          | 0.884 | 0.986          |
|    |                               | < 3k Da HA    | 0.037                                        | 0.995          | 0.046                          | 0.923 | 0.966          |
| 6  | 10                            | pristine HA   | 0.126                                        | 0.999          | 0.121                          | 1.01  | 0.992          |
|    |                               | > 100 kDa HA  | 0.134                                        | 0.999          | 0.134                          | 0.998 | 0.992          |
|    |                               | 30-100 kDa HA | 0.119                                        | 0.999          | 0.127                          | 0.954 | 0.981          |
|    |                               | 10-30 kDa HA  | 0.105                                        | 0.999          | 0.099                          | 1.00  | 0.972          |
|    |                               | 3-10 kDa HA   | 0.070                                        | 0.999          | 0.068                          | 1.00  | 0.994          |
|    |                               | < 3k Da HA    | 0.047                                        | 0.999          | 0.048                          | 0.981 | 0.996          |
| 6  | 100                           | pristine HA   | 0.116                                        | 0.999          | 0.101                          | 1.06  | 0.997          |
|    |                               | > 100 kDa HA  | 0.126                                        | 0.999          | 0.129                          | 0.987 | 0.998          |
|    |                               | 30-100 kDa HA | 0.111                                        | 0.999          | 0.115                          | 0.973 | 0.993          |
|    |                               | 10-30 kDa HA  | 0.090                                        | 0.998          | 0.09                           | 0.981 | 0.982          |
|    |                               | 3-10 kDa HA   | 0.062                                        | 0.999          | 0.064                          | 0.954 | 0.959          |
|    |                               | < 3k Da HA    | 0.042                                        | 0.999          | 0.043                          | 0.972 | 0.957          |

### S3. Supplementary Figures

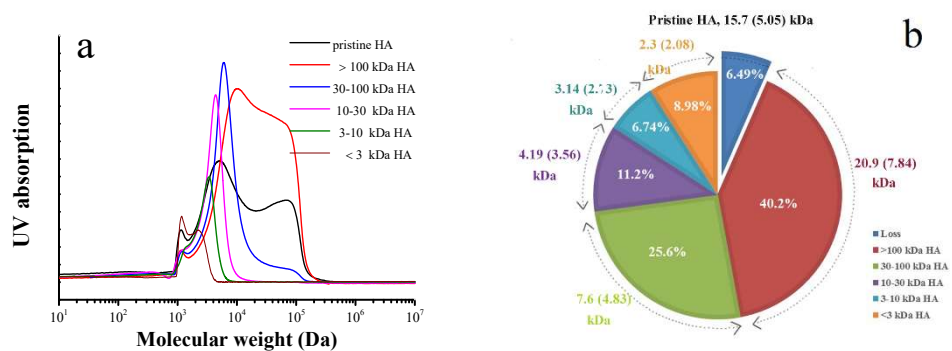

**Fig. S1** HPSEC graphs (a) and weight/number-averaged molecular weight and mass composition (b) of the pristine and MW-fractionated HAs.

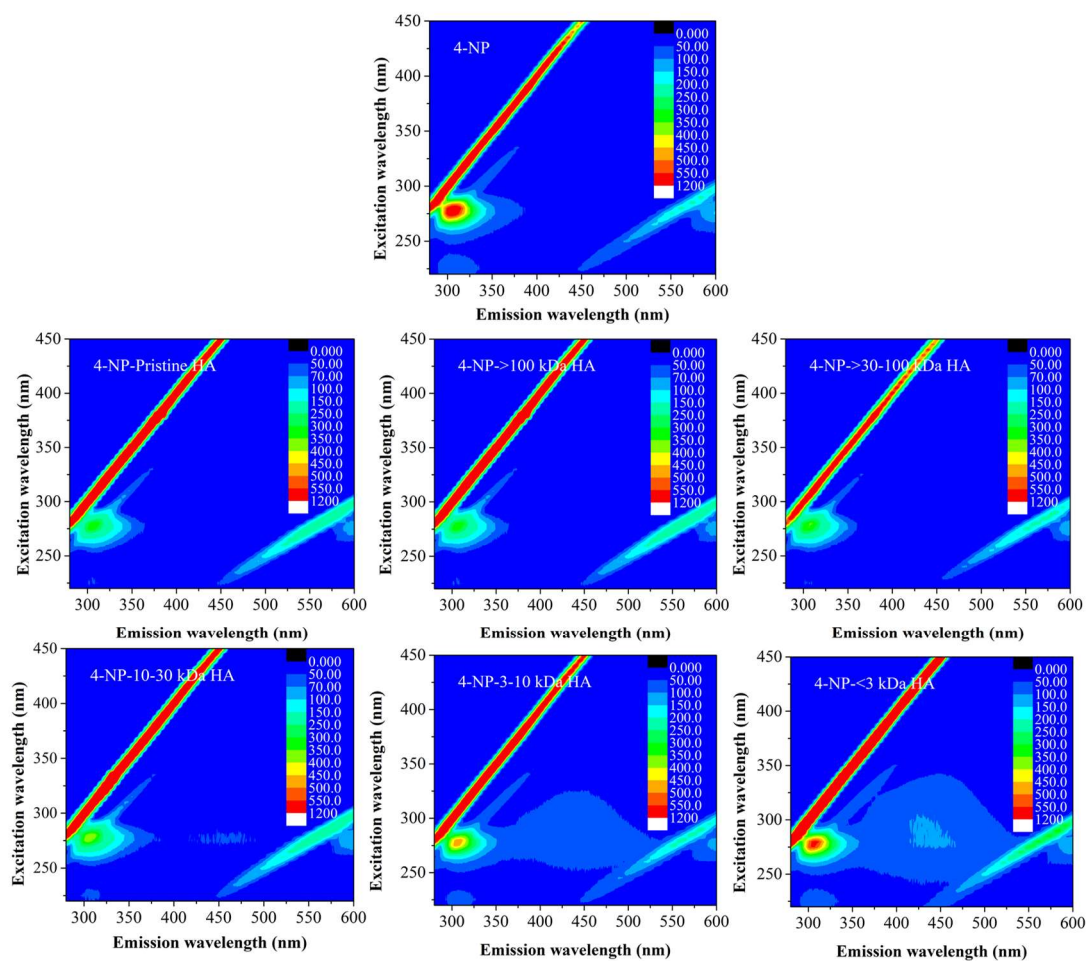

**Fig S2.** The fluorescence EEM spectra of 4-NP without and with 1 mg C/L pristine- and MW-fractionated HAs; T = 298 K; pH =6.0, 1mol/L NaNO<sub>3</sub>.

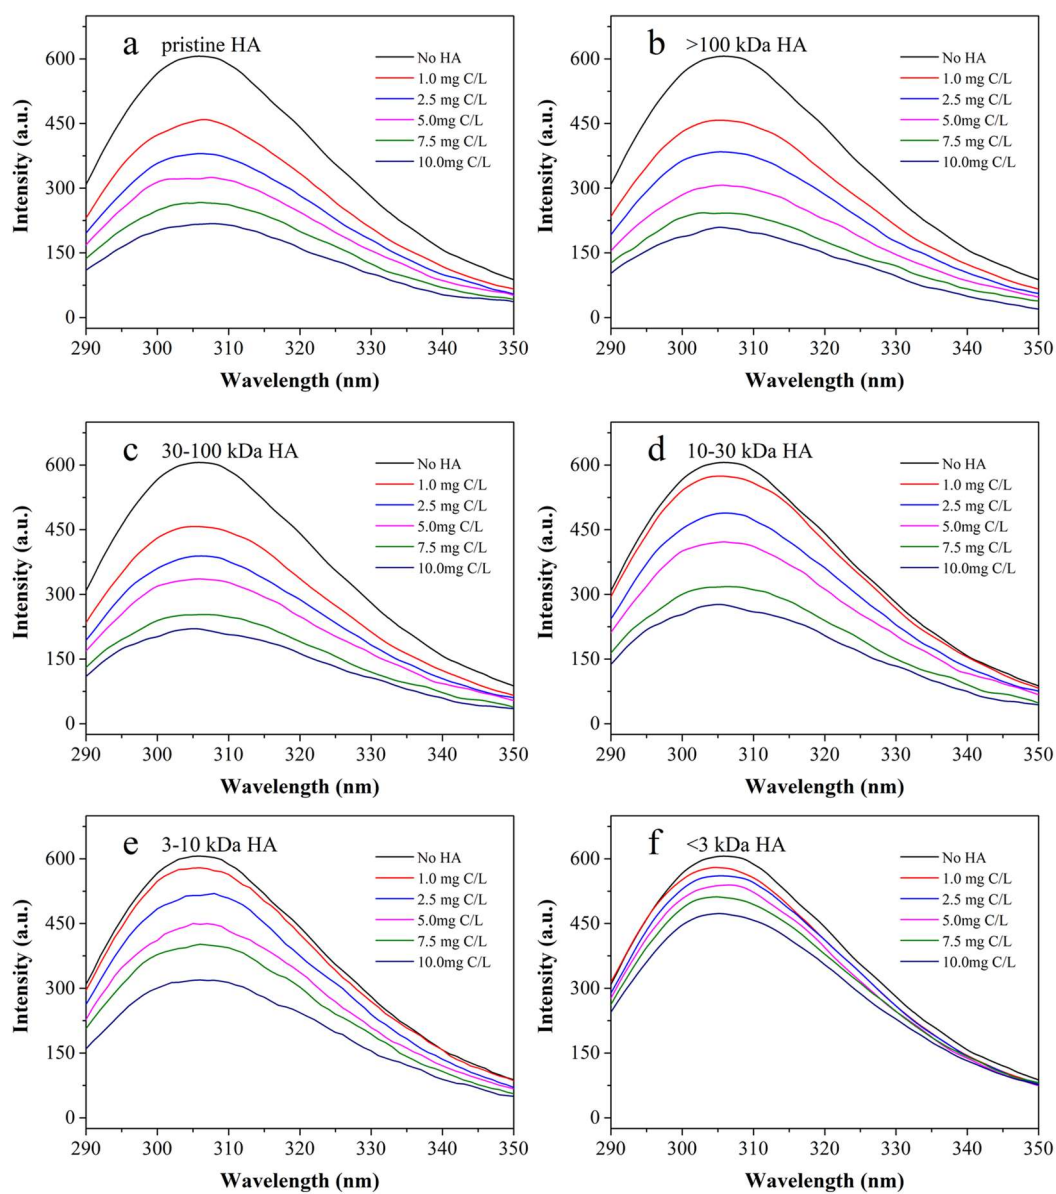

**Fig. S3.** Corrected fluorescence emission spectra of the 4-NP-HAs systems. The concentration of 4-NP was 1 mg/L; Ex = 280 nm; T = 298 K; pH = 6.0; 1mol/L NaNO<sub>3</sub>.



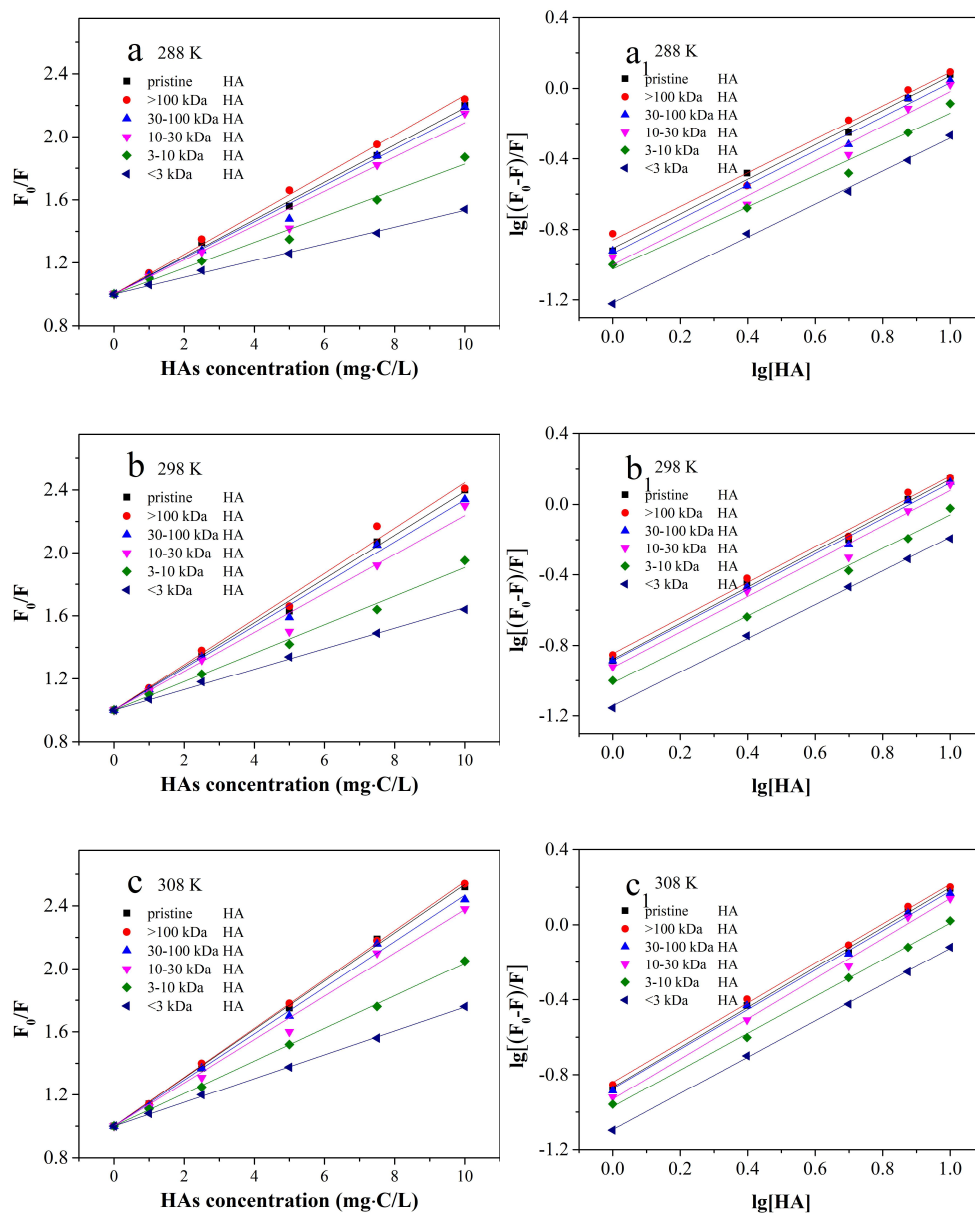

**Fig. S4** Stern–Volmer (a-c) and Site-binding ( $a_1$ - $c_1$ ) equation plots of 4-NP for HAs at 288K, 298K and 308 K; pH =6.0; 1mol/L NaNO<sub>3</sub>.

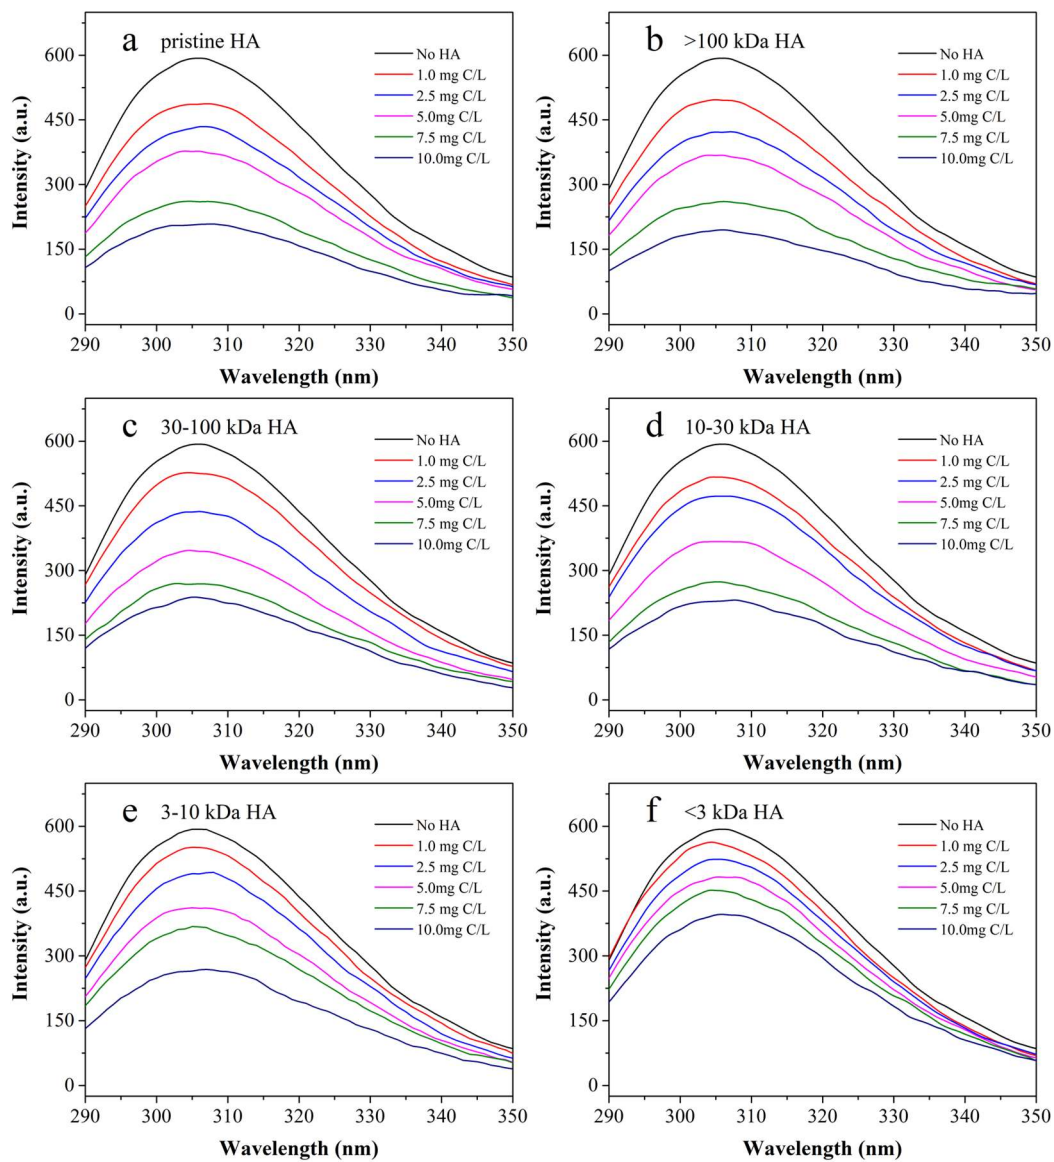

**Fig. S5.** Corrected fluorescence emission spectra of the 4-NP-HAs systems. The concentration of 4-NP was 1 mg/L; Ex = 280 nm; T = 298 K; pH = 3.0; 1 mol/L NaNO<sub>3</sub>.

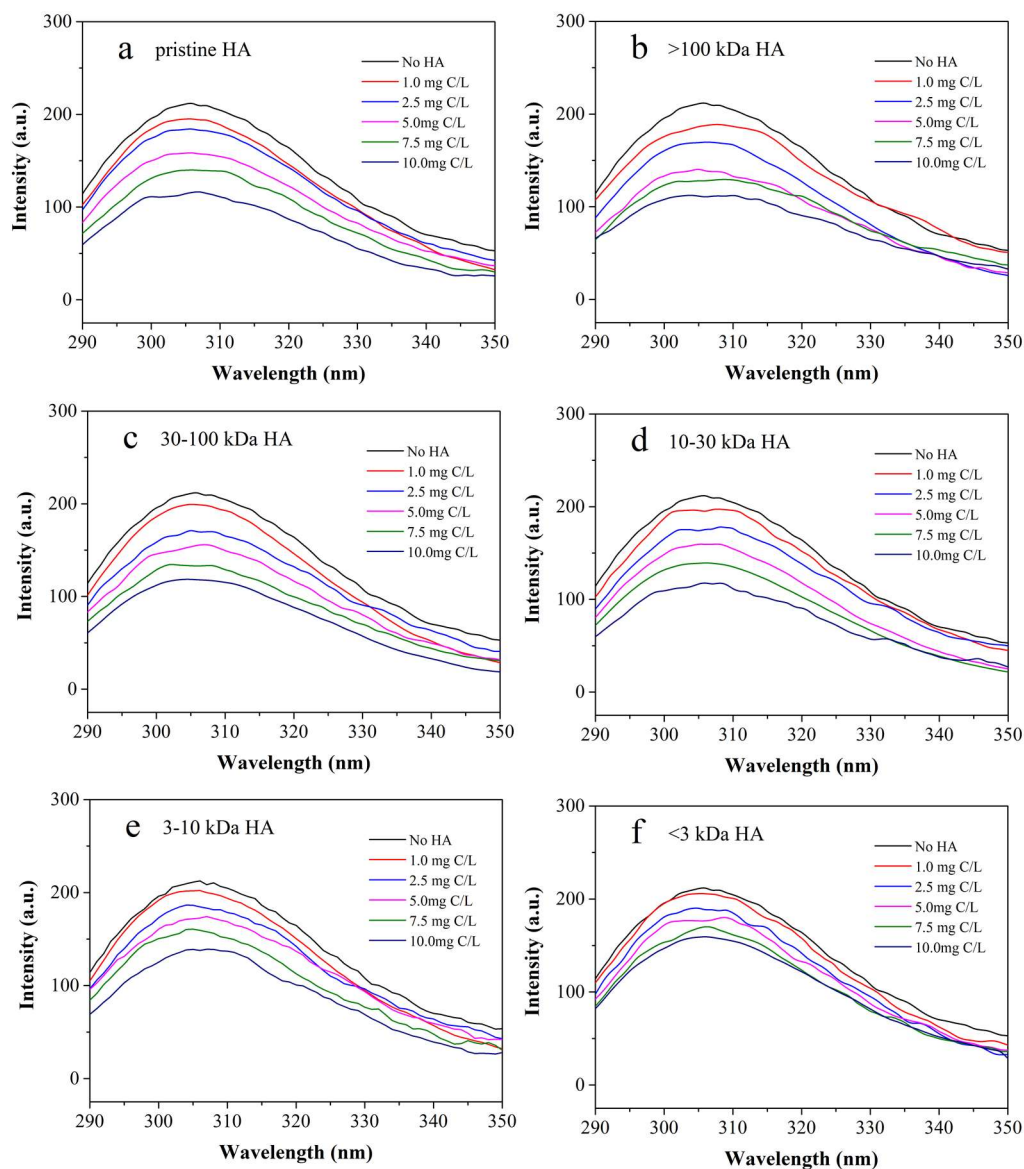

**Fig. S6.** Corrected fluorescence emission spectra of the 4-NP-HAs systems. The concentration of 4-NP was 1 mg/L;  $E_x = 280 \text{ nm}$ ;  $T = 298 \text{ K}$ ;  $\text{pH} = 11.0$ ;  $1 \text{ mol/L NaNO}_3$ .

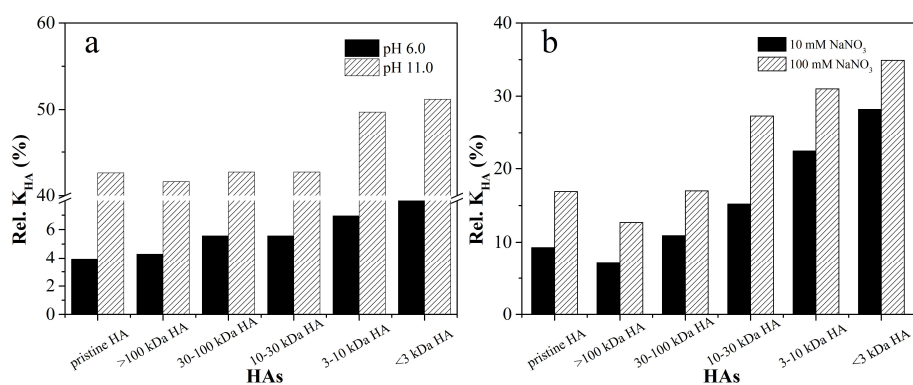

**Fig. S7** The relative reduction of  $K_{HA}$  for MW-fractionated HAs with increasing pH ( $\text{Rel.}K_{HA} = (K_{HA, \text{pH}3} - K_{HA}) / K_{HA, \text{pH}3} \times 100\%$ ) and  $\text{NaNO}_3$  concentration ( $\text{Rel.}K_{HA} = (K_{HA, 1 \text{ mM}} - K_{HA}) / K_{HA, 1 \text{ mM}} \times 100\%$ );  $T = 298 \text{ K}$ .

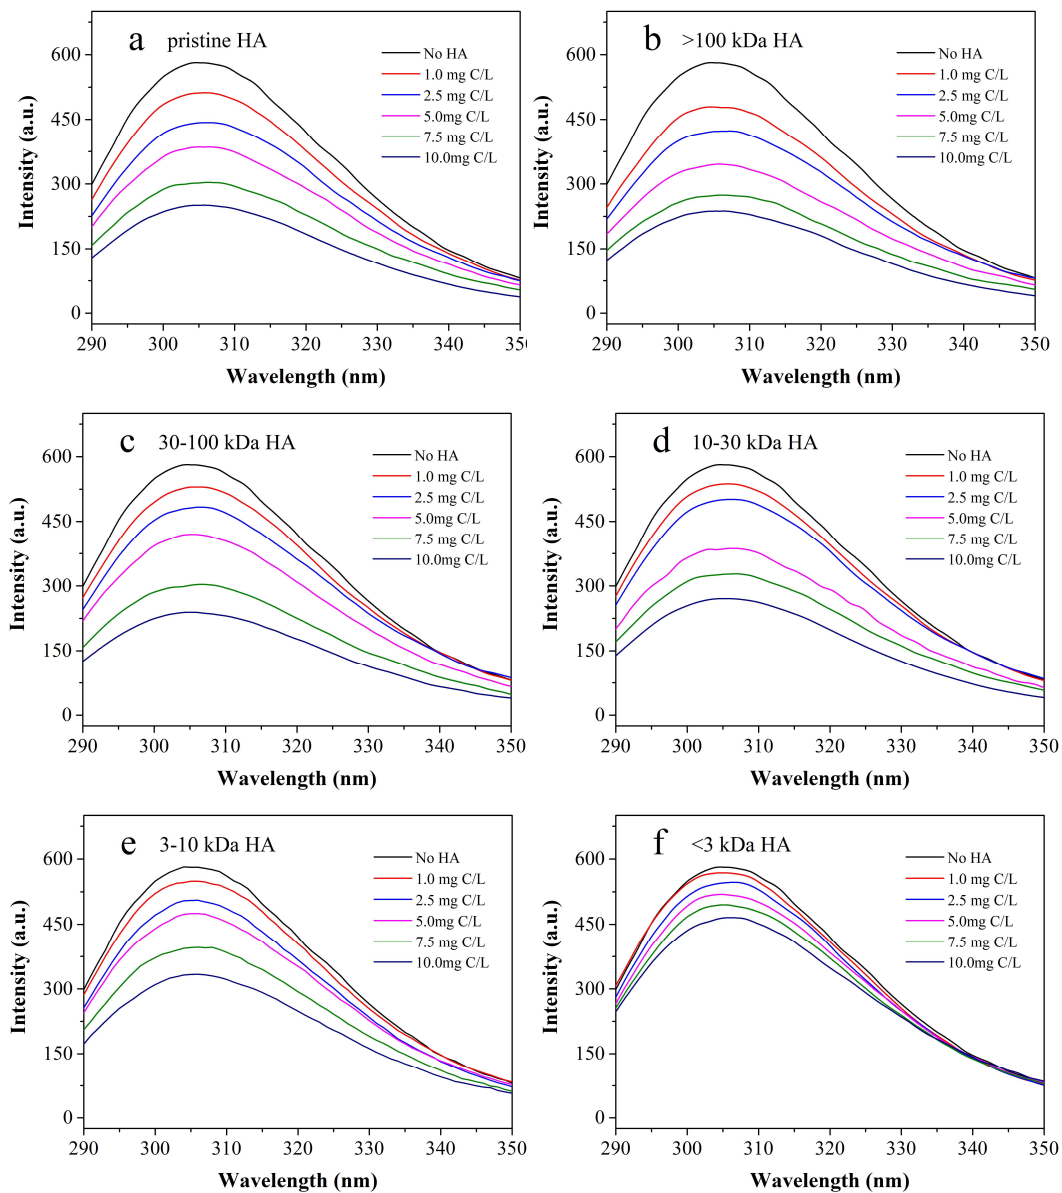

**Fig.**

**Fig. S8.** Corrected fluorescence emission spectra of the 4-NP-HAs systems. The concentration of 4-NP was 1 mg/L; Ex = 280 nm; T = 298 K; pH = 6.0; 10 mol/L NaNO<sub>3</sub>.

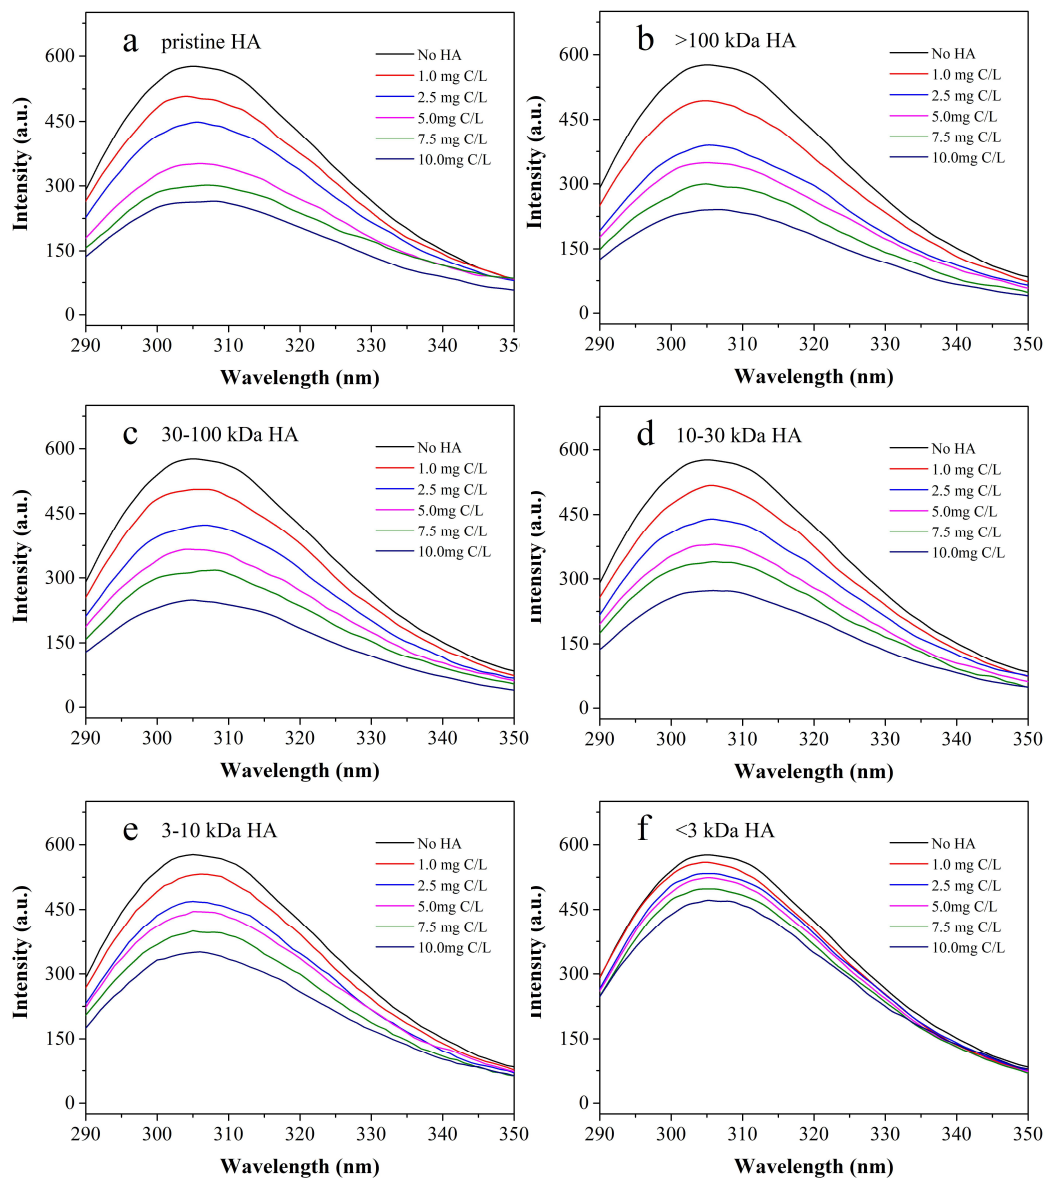

**Fig. S9.** Corrected fluorescence emission spectra of the 4-NP-HAs systems. The concentration of 4-NP was 1 mg/L; Ex = 280 nm; T = 298 K; pH = 6.0; 100mol/L NaNO<sub>3</sub>.

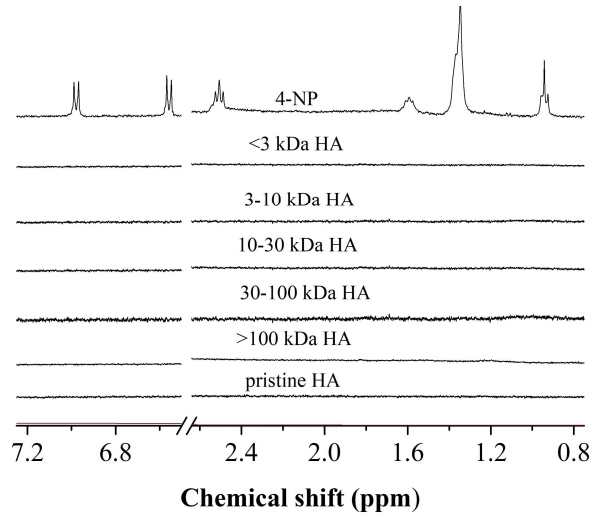

**Fig. S10**  $^1\text{H}$  NMR spectra of 4-NP and 60  $\mu\text{g}$  C/L pristine- and MW-fractionated HAs.

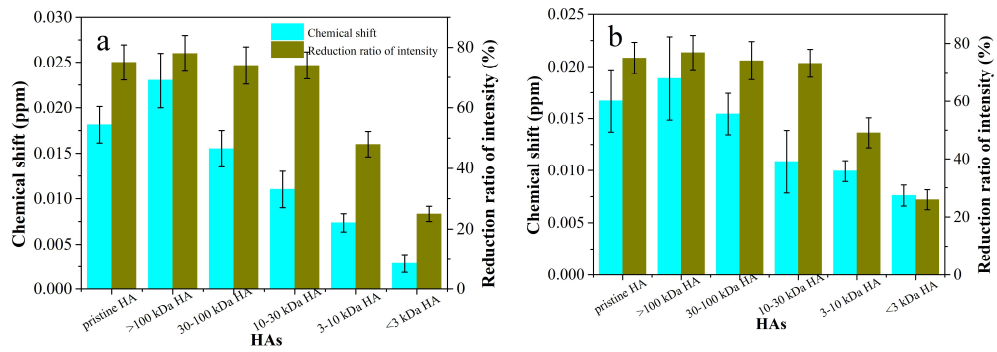

**Fig. S11** Changes of H3, H4 (a) and H2, H5 (b) in chemical shift ( $\Delta\delta$ ) and reduction ratio of intensity (%) in different 4-NP-HAs systems. The error bars are representative of the standard deviation of the triplicates.
